# Supplementary material for: From small scale variability to mesoscale stability in surface ocean pH: implications for air-sea CO 2 equilibration
Source: Copernicus journal article supplement (doi:10.5194/egusphere-2024-2853), 2024-10-30
Supplement: Supplementary file [file egusphere-2024-2853-AC2-supplement.pdf]

**RC1: 'Comment on egusphere-2024-2853',  
Anonymous Referee #1 – 21 Jan 2025**

**General Comments:**

The authors present their work discussing the need for fine spatial and temporal pH data, thus requiring the high resolution measurements they made on two transect cruises. However, then ultimately conclude that less resolved traditional research cruises are able to capture the pH variability we need. The authors mention the use of these fine scale measurements in coastal and dynamic environments, which makes sense. But the authors have failed to convey what is the need for the same fine scale measurements in the less dynamic open ocean environments, and what the measurements would be used for. Many processes are at play, but what is the goal of disentangling these processes in the open ocean? The authors should try to convey their message without devaluing their work in the conclusions.

With regards to scientific significance, the authors present underway pH measurements that are not very common to my knowledge. Importantly, they calibrate their underway measurements with discrete measurements. The authors highlight the use of underway pH measurements, though ultimately conclude they are not necessary to be this fine scale, somewhat mitigating the significance of their work. With regards to scientific quality, I do appreciate the details the authors present regarding their underway pH measurements and associated discrete measurements. However, their corrections and offsets are quite large. They compare very small changes in pH to determine which influences (temperature, biological activity, or water masses) are dominant, but their changes are much smaller than the offsets they present. This leads me to question if these small changes are really meaningful within all the noise. With regards to presentation quality, the authors generally present their work in a clear manner. The results section discussing the influences to pH is a bit confusing to follow. I will discuss more about this in the specific comments section below.

I am concerned with the results of this manuscript, which compare observed (corrected) underway pH values with pH calculated in a variety of manners. The authors suggest very small residuals, but this does not account for the uncertainty in their underway pH measurements. Specifically, in Fig. 4 and 5, almost all of the various pH calculations fall within the pH uncertainty. So I am not sure specific conclusions can be made from this pH data.

We appreciate the reviewer's detailed feedback and the opportunity to clarify the significance of our findings. We recognize the need to better convey how fine-scale pH measurements contribute to understanding open-ocean processes, beyond their established importance in dynamic coastal systems.

Our results demonstrate that while the key drivers of pH variability—temperature, biological activity, and water mass properties—are well understood, high-resolution data reveal the challenge of isolating their individual contributions at fine spatial and temporal scales. This complexity is not always apparent in coarser datasets, which may oversimplify the interplay between these factors.

Rather than resolving these dynamics, our study exposes the limits of traditional attribution approaches and highlights the difficulty of linking observed pH variability to a single dominant driver when multiple processes operate simultaneously.

This is particularly relevant for understanding air-sea CO<sub>2</sub> equilibration timescales, biogeochemical cycling, and the sensitivity of ocean pH to short-term fluctuations. Even in open-ocean environments, small-scale variability can have implications for how we interpret CO<sub>2</sub> exchange, model acidification trends, and assess ecosystem responses. Our findings indicate that fine-scale pH fluctuations are often systematic rather than random noise, reinforcing the need for high-resolution datasets to refine predictive models and improve our mechanistic understanding of pH variability.

With regard to data accuracy, we acknowledge the substantial offsets in our underway pH measurements and have carefully accounted for them through calibration with discrete samples. To further assess the robustness of our observed variability, we conducted a signal-to-noise ratio (SNR) analysis, which confirms that temperature-driven pH fluctuations in the North Atlantic exceed measurement noise, while variations in the South Pacific largely fall within uncertainty. We have revised the manuscript to explicitly discuss these results and clarify their implications for distinguishing real environmental signals from instrumental limitations.

To address the reviewer's concerns about the manuscript's framing, we have refined our discussion and conclusions to emphasize what our high-resolution measurements reveal, rather than whether lower-resolution datasets are sufficient. Our results underscore the value of fine-scale pH observations in uncovering the complexity of pH variability, even in less dynamic open-ocean regions, and highlight the challenges in attributing short-term fluctuations to single drivers. We hope these revisions better reflect the significance of our findings and the broader implications of our work. Please see also our response to the final comment of the other reviewer.

We have revised the manuscript accordingly.

## **Specific Comments:**

**The authors indicate they are looking at fine scales of up to 100 km<sup>2</sup> and days across ocean basins (line 106). However, later in the manuscript they begin discussing pH changes on the order of seconds to minutes (lines 402-418). The controls of pH are being convoluted between larger scale processes and split-second thermodynamics. In reality, the instant thermodynamics of the carbon system are not controlling the pH at longer time scales. The whole thing is quite confusing.**

The sentence was changed to “Here, we investigate how surface seawater pH varies across fine spatio-temporal scales, focusing on changes occurring over areas up to 100 km<sup>2</sup> and timescales of hours to days across different ocean basins (i.e., North Atlantic and South Pacific Oceans) and identify abiotic and biotic factors driving these variations.” The discussion section on thermodynamics has also been nuanced.

**Lines 140-156: What are the precision and accuracy estimates for the pH optode? A lot of the discussion is based on looking at small changes in pH, but there is no mention for how accurate the pH optode is by itself.**

To clarify, we have now explicitly stated the manufacturer-reported accuracy ( $\pm 0.05$  for pH 7.5–9.0 and  $\pm 0.1$  for pH 7.0–7.5 after a two-point calibration) and precision ( $\pm 0.003$  at pH 8.0) in the manuscript. While the optode’s accuracy may introduce a systematic offset, our analysis focuses on relative variations in pH rather than absolute values. Additionally, we applied post-cruise corrections using discrete TA and DIC samples to assess and correct for sensor drift, ensuring the robustness of the observed fine-scale variability. These clarifications have been incorporated into Section 2.2:

“The manufacturer-reported accuracy of the optode is  $\pm 0.05$  for pH 7.5–9.0 and  $\pm 0.1$  for pH 7.0–7.5 after a two-point calibration, with a precision of  $\pm 0.003$  at pH 8.0.”

**Lines 181-186: Why was the two point calibration conducted so far from the pH points of interest? All surface ocean pH will be around 8.1 (+/- 0.1 roughly). So why was one of the calibration points at pH 2-4 and 10-11? Also, how accurate is this calibration? The authors also mention making a pH offset adjustment with a CRM, though CRMs only give certified values for TA and DIC. The authors should give more details of this process.**

The two-point calibration using PyroScience buffer capsules at pH 2–4 and pH 10–11 follows the manufacturer’s recommended procedure to establish a stable response function across the sensor’s full operating range (pH 7.0–9.0 on the total scale). The sensor contains a chemical that has a pH-dependent fluorescent response to light stimulation. The purpose of the calibration is not to produce a traditional calibration line but rather to characterize the maximum and minimum responses. As the pK<sub>a</sub> of the fluorescent chemical is around 9, these maximum/minimum responses will occur at any pH above ~9 or below ~7, regardless of the exact pH. Additionally, a pH offset adjustment was applied using certified reference material (CRM). While CRMs provide certified values for TA and DIC rather than pH directly, we used these values to calculate pH<sub>CRM</sub> using the carbonate system equilibrium constants from Lueker et al. (2000). We have now clarified this methodology in Section 2.3:

“A one-point calibration of the temperature probe was performed against a thermometer inside a water bath (Lauda Ecoline RE106). A two-point calibration of the pH sensor was conducted following the manufacturer's recommended procedure, using PyroScience pH buffer capsules (pH 2 or pH 4 for the acidic calibration point, pH 10 or pH 11 for the basic calibration points). These calibration points deliberately fall far outside the sensor's operating range from pH 7-9 in order to characterize its maximum and minimum responses. Buffers were prepared by dissolving each capsule's powder into 100 mL MilliQ water.

To further refine the accuracy of the measurements, a pH offset adjustment was applied using certified reference material (CRM, batches #189, #195, and #198; provided by Andrew Dickson, Scripps Institution of Oceanography). Although CRMs do not provide direct certified pH values, we calculated  $\text{pH}_{\text{CRM}}$  from the CRM TA and DIC using the carbonate system equilibrium constants from Lueker et al. (2000). This  $\text{pH}_{\text{CRM}}$  value was then used to adjust the optode-based pH measurements to improve accuracy and align them with discrete observations.”

**Fig. 3b: Why did the raw pH measurements shift from being always below corrected values to always above corrected values?**

The shift in raw pH measurements from being consistently lower than the corrected values to consistently higher is due to a break in the middle of the cruise, during which the optode system was stopped and subsequently recalibrated for the second half of the dataset. This recalibration adjusted the sensor response, which could have influenced the direction of the offset. The exact cause of the shift in correction trends likely stems from sensor-specific calibration factors, as optode response characteristics can vary slightly between calibrations. However, the applied corrections ensured consistency across both segments of the cruise by aligning the continuous pH dataset with discrete measurements.

**Lines 259-261: The reader needs more information here about how pH was calculated from TA and DIC. You give more details later in the manuscript, but it needs to be mentioned when calculations are first introduced.**

Details were added: “ $\text{pH}_{\text{obs}}$  was calculated from TA and DIC UWS discrete samples) using PyCO2SYS (Version 1.8.2; (Humphreys et al., 2022), with the carbonic acid dissociation constants of Sulpis et al. (2020), the bisulfate dissociation constant of Dickson (1990), the total boron to chlorinity ratio of Uppström (1974), and the hydrogen fluoride dissociation constant of Dickson and Riley (1979).”

**Line 277: The constants of Lueker et al. (2000) are most commonly used in “best-practice” calculations of open ocean conditions. I am curious by your choice to use Sulpis et al. (2020) instead, as this set of constants has been shown to perform worse than Lueker with regards to internal consistency analyses. I suspect your readers will have the same question. Can you please justify your choice or switch to using the Lueker constants?**

We have now revised our calculations to use them instead to ensure consistency with standard approaches. This change has been implemented throughout the manuscript.

**Lines 280-287: For the derived pH parameters, which TA and DIC are you using? The underway measurements or the derived TA and calculated DIC (from pH and derived TA)? You need to be clearer.**

For the derived pH parameters, we used the estimated total alkalinity (TA) from Lee et al. (2006) and the calculated dissolved inorganic carbon (DIC) derived from measured pH and estimated TA. These values were used as the baseline carbonate chemistry parameters, with variations in temperature and salinity applied to assess their respective influences on pH. This is now clarified in the text.

**This process seems convoluted. You already used pH to calculate DIC and are now using DIC to calculate pH. I'm not sure this is a sound rationale. Also, your  $pH_{TA,fCO_2}$  is calculated using  $fCO_2$  that was already calculated using pH. Instead, could you use inputs of measured underway pH and derived TA as your inputs, and then simply adjust your output conditions to be the temperature and salinity changes you are after?**

When one uses measured underway pH & TA as input and adjust the output conditions to be a different temperature and salinity of interest, then (Py)CO2SYS first uses pH & TA to calculate TA and DIC, and then calculates pH at the new T/S from TA and DIC. In other words, our approach is already identical to the reviewer's suggestion, but we have explicitly described the steps that are normally 'hidden' within (Py)CO2SYS calculations. The  $pH_{TA,fCO_2}$  is calculated from daily mean  $fCO_2$ , not the full set of  $fCO_2$  values with diel variability, so it is not the same as simply reversing the calculation, and still shows a useful result.

Our approach ensures consistency by using a single set of carbonate chemistry parameters (TA and DIC) as the baseline for assessing temperature and salinity influences. While this means that pH is initially used to estimate DIC, the subsequent calculations allow for direct comparisons of observed and expected pH under different environmental scenarios. This approach ensures that we are testing how expected pH would change if only temperature and salinity varied, without introducing additional assumptions about TA and DIC variability. Additionally, using TA and DIC as the fundamental inputs (rather than pH directly) provides a clearer way to evaluate the relative influence of abiotic drivers (temperature, salinity) versus biological or air-sea  $CO_2$  exchange processes. The following paragraph was added to Section 2.7:

“Our approach maintains consistency by using a single set of carbonate chemistry parameters (TA and DIC) as the baseline for assessing temperature and salinity influences. While pH is initially used to estimate DIC, the subsequent calculations isolate the effects of temperature and salinity without assuming variability in TA or DIC. This method enables direct comparisons between observed and expected pH, providing a clearer framework for distinguishing abiotic influences from biological processes and air-sea  $CO_2$  exchange.”

**Lines 305-323: Again, I am curious what the uncertainty of the actual optode is. This needs to be considered as an uncertainty contribution.**

We acknowledge the reviewer's concern regarding the appropriate treatment of uncertainty in our pH measurements. To ensure a robust estimate, we carefully considered different sources of error. The manufacturer-reported accuracy ( $\pm 0.05$  for pH 7.5–9.0,  $\pm 0.1$  for pH 7.0–7.5) represents a

systematic error, which was already accounted for through calibration against discrete CRM samples and should not be treated as a random uncertainty. Similarly, the reported precision ( $\pm 0.003$  at pH 8.0) describes the repeatability of measurements but does not represent an uncertainty range for error propagation.

Instead, we used the observed pH measurement uncertainty as the most appropriate estimate, as it directly captures real-world variability, including instrumental noise, drift, and environmental fluctuations. This uncertainty was computed by combining two main sources: (1) the uncertainty in the TA and DIC measurements used to calculate  $\text{pH}_{\text{obs}}$ , and (2) the correction of the UWS pH measurements using  $\text{pH}_{\text{obs}}$  TA, DIC. Specifically, TA and DIC precision were determined based on the RMSE from repeated standard measurements in the laboratory (0.92 and 1.95  $\mu\text{mol/kg}$ , respectively), and a Monte Carlo simulation was applied to propagate this uncertainty into  $\text{pH}_{\text{obs}}$ . Additionally, a bootstrapping approach ( $n=1000$  iterations) was used to assess the uncertainty in the pH correction, where subsets of discrete samples were randomly omitted and their values varied within their own RMSE. This method captures the likely variability in TA and DIC measurements and accounts for potential sensitivity in the correction process.

Rather than arbitrarily incorporating precision or accuracy values, we propagated only the dataset-derived uncertainty, ensuring that our error estimates reflect actual measurement conditions after calibration and correction. This approach avoids overestimating or underestimating uncertainty and provides the most realistic estimate of measurement confidence.

The following was added to Section 2.9.1:

"To provide a comprehensive uncertainty estimate, we considered multiple sources of potential error. The manufacturer-reported accuracy ( $\pm 0.05$  for pH 7.5–9.0,  $\pm 0.1$  for pH 7.0–7.5) represents a systematic bias that was addressed through calibration against discrete CRM samples and is not appropriate for inclusion as a random uncertainty. Likewise, the reported precision ( $\pm 0.003$  at pH 8.0) reflects the repeatability of the measurements but does not quantify the full range of uncertainty for error propagation."

**Lines 310-323: Have you considered that the uncertainty in  $\text{pH}_{\text{TA,DIC}}$  calculations may not be random? There is a known pH-dependent pH offset (see Williams et al. 2017) where the error in calculated pH from TA and DIC is dependent on the pH. It seems you may be underestimating the uncertainty in  $\text{pH}_{\text{TA,DIC}}$ .**

We appreciate the reviewer's concern regarding potential pH-dependent biases in  $\text{pH}_{\text{TA,DIC}}$  calculations, as highlighted by Williams et al. (2017). However, we believe this effect is negligible in our study for several reasons. First, our observed pH values remain within a relatively narrow range (8.05–8.1 for the North Atlantic and 7.95 to 8.05 for the South Pacific), where pH-dependent errors in calculated  $\text{pH}_{\text{TA,DIC}}$  are expected to be minimal. Additionally, we accounted for uncertainties in TA and DIC measurements by incorporating the RMSE from repeated laboratory measurements of a known standard water sample (0.92  $\mu\text{mol/kg}$  for TA and 1.95  $\mu\text{mol/kg}$  for DIC) and applying a Monte Carlo simulation to propagate this uncertainty into the calculated  $\text{pH}_{\text{TA,DIC}}$ . This approach captures the range of variability in  $\text{pH}_{\text{TA,DIC}}$  due to measurement uncertainty and provides a robust estimate of its precision. While a systematic pH-dependent bias could, in theory, exist, we cannot independently assess this effect since we use  $\text{pH}_{\text{TA,DIC}}$  to correct drift in the optode-based pH

measurements. Given these considerations, we expect that any potential pH-dependent bias in our calculated  $\text{pH}_{\text{TA,DIC}}$  would be small relative to the overall measurement uncertainty.

**Lines 333-344: This information is more introductory than methods.**

Sentence now reads “Air-Sea  $\text{CO}_2$  fluxes were computed based on the relationship:”

**Lines 402-418: There are a lot of technical details here about essentially what happens to a  $\text{CO}_2$  molecule in the span of seconds to minutes. However, the timescales the authors say they are working with is on the order of days. What is the relevance of these split-second reactions? The temperature is not changing fast enough to observe changes in the dissociation of the carbon species at this scale. You may see temperature changes between day and night, but not within seconds to minutes.**

This paragraph was removed.

**Lines 415: These waters don’t have a higher heat capacity, they are just insulated from the air.**

This paragraph was removed.

**Section 3.1: This section is quite difficult to follow. The authors are trying to discuss differences in pH between two basins, from day to night cycles, and throughout cycles 1-n during a cruise. Perhaps the authors should choose to discuss these types of comparisons individually, instead of all together. I think the more interesting results are between basins and between day and night. The specific cycles themselves are a bit too in the weeds.**

To improve clarity and better emphasize the most relevant comparisons, we have restructured the section into two distinct sub-sections:

- **3.1.1 Basin-Scale Comparison** – This section now focuses on the overarching differences in pH variability between the North Atlantic and South Pacific. We emphasize how temperature and salinity influence pH differently in each region, highlight differences in equilibration dynamics, and discuss how physical oceanographic processes contribute to these variations. By consolidating the discussion of basin-scale trends, we provide a clearer contrast between the two regions without interspersing cycle-specific details.
- **3.1.2 Diurnal pH Variability** – This section explicitly addresses day-night differences in pH patterns within each basin. We discuss how temperature-driven pH changes follow expected trends in many cases while also highlighting instances where deviations occur, suggesting additional biological or physical influences. Instead of detailing each individual cycle, we focus on broader diurnal trends and the key deviations from expected patterns, making the discussion more concise and interpretable.

Additionally, we have shifted the focus away from the small-scale details of each cycle and instead emphasized the general patterns and overarching trends. While we retain references to individual cycles where necessary to illustrate key findings, the revised discussion now prioritizes the broader-scale dynamics that drive pH variability in these regions.

**Lines 452-464: This is again a lot of details about instantaneous thermodynamics. These processes are occurring on much quicker timescales than days, so I am not sure of its**

**relevance to this manuscript. For open ocean pH, with all the uncertainties of measurements and changing dynamics, there is no way to observe these fine scale processes. I suggest the discussions of thermodynamics be made more concise or removed.**

We feel that this aspect of the discussion is important, as it highlights the distinction between the rapid temperature-driven shifts in pH and the longer timescales required for CO<sub>2</sub> equilibration. These processes contribute to the observed variability in pH and are particularly relevant when considering the interplay between thermodynamic forcing and air-sea exchange.

To address the reviewer's concern, we have refined our discussion to better emphasize the timescales relevant to our observations. Specifically, we now clarify that while temperature-driven changes in pH occur rapidly, their persistence in observed pH depends on how long a given water mass has been exposed to new conditions. This ensures that our discussion remains focused on the processes that shape pH variability at the spatial and temporal scales of our study while avoiding unnecessary emphasis on instantaneous thermodynamics.

**Section 3.2: Can the authors point to any studies discussing the generally expected levels of biological activities in these open ocean regions? They mention strong biological day-night signals, but would you actually expect to see much change in an open ocean area?**

We have now included references to studies on primary productivity in the open ocean, particularly in the North Atlantic and South Pacific, to clarify whether strong biological pH signals would be expected. Our revisions highlight that while some cycles show patterns consistent with biological activity, these variations are generally expected to be weaker in oligotrophic open-ocean environments compared to more dynamic coastal or upwelling regions.

**Lines 578-584 (and throughout results): There is a lot of background information that would be better suited for the introduction.**

This part of the section was removed: "The North Atlantic is characterized by complex interactions among water masses, leading to higher turbulence and susceptibility to rapid and significant changes in water mass properties and circulation patterns, influenced by both past and present climatic conditions (Lynch-Stieglitz, 2017; Gebbie, 2014). This complexity is partly due to the Atlantic Meridional Overturning Circulation (AMOC), which is sensitive to various climate perturbations and has historically undergone significant reorganizations, especially during climatic transitions such as the Last Glacial Maximum (Curry and Oppo, 2005; Duplessy et al., 1988)."

**Lines 582-584: Now the authors are discussing time frames from the LGM, which is significantly longer than anything discussed in this paper. This seems irrelevant.**

The mention of the Last Glacial Maximum was removed from the discussion.



## **Technical Corrections:**

**Line 19: Is it Dec 2019-Jan 2020? List both years since they are different.**

Correction: December 2020 to January 2021

**Lines 32-35: These two sentences say the same thing, and could be combined for conciseness.**

The sentence now reads “The uptake of atmospheric CO<sub>2</sub> by the ocean’s surface increases hydrogen ion concentration, a process known as ocean acidification, which has led to a 30–40% rise in surface seawater acidity and a corresponding pH decrease of ~0.1 since around 1850 (Gattuso et al., 2015; Jiang et al., 2019; Orr et al., 2005).”

**Line 40-41: “High resolution studies” of what exactly?**

The sentence now reads “High-resolution studies of surface ocean carbonate chemistry and air-sea CO<sub>2</sub> exchange have significantly advanced our understanding of the upper ocean’s carbon cycle.”

**Line 87: To be clear, increased atmospheric CO<sub>2</sub> only boosts oceanic CO<sub>2</sub> uptake if the atmospheric CO<sub>2</sub> > oceanic CO<sub>2</sub>. If atmospheric CO<sub>2</sub> increases in a region, but is still less than oceanic CO<sub>2</sub>, the flux will still be towards the atmosphere.**

The sentence now reads “When atmospheric CO<sub>2</sub> exceeds oceanic CO<sub>2</sub>, the ocean takes up CO<sub>2</sub>, lowering pH; conversely, when atmospheric CO<sub>2</sub> decreases below oceanic CO<sub>2</sub>, outgassing occurs, raising pH”

**Line 96: Might be helpful to include a range of latitudes for the “average North Atlantic latitude” since you mention a separate region above 55 N later in the sentence. Also, since you first mention N Atlantic has longer equilibration times, you should list the 18 month time-frame first for sentence structure.**

The sentence now reads “In the North Atlantic, equilibration timescales for CO<sub>2</sub> between the atmosphere and the ocean’s surface mixed layer vary significantly with latitude. In regions above 55°N, these timescales can extend up to 18 months, while at lower latitudes, such as around 30°N, they range from 3 to 6 months”

**Line 101: Surface temperatures?**

Sentence now reads “The South Pacific, with its shallower mixed layers and higher average surface temperatures, facilitates shorter equilibration times and enhances CO<sub>2</sub> uptake rates”

**Line 117: Give date ranges for both cruises for consistency.**

Caption now reads “Figure 1. Locations of pH measurements during two oceanographic cruises used in this study: SO279 in the North Atlantic (December 2020-January 2021) and SO289 in the South Pacific (February-April 2022). Surface seawater pH<sub>total</sub> for December 2022 from the OceanSODA product is shown in the background (Gregor & Gruber, 2020).”

**Line 118: You need to define pH total (which should be denoted as  $\text{pH}_T$ ) before including in the figure caption. You should also make it clear you are measuring  $\text{pH}_T$  throughout the manuscript.**

$\text{pH}_{\text{total}}$  was replaced by “pH on the total scale” in the figure caption – also, in section 2.2 of the Methods, an additional sentence was added: “Unless explicitly stated otherwise, all references to pH in this manuscript refer to pH on the total scale.”

**Line 122: Cruises datasets should be cited or give appropriate links to the available data. Do the cruises have cruise reports you could link to?**

Cruise datasets and reports providing further details on data collection and methodology are cited in the following two paragraphs.

**Line 134: Again, listing of dates needs to be consistent for both cruises.**

Listing for modified for consistency.

**Line 135: “Discrete carbonate chemistry and nutrient samples” – you should list the parameters like you did for the first cruise in line 128 OR mention they collected the same samples as the cruise above. In general, try to make sure you have parallel structure in your sentences.**

Sentence now reads “The data collection also included the same parameters as SO279, with discrete samples from the CTD rosette ( $n=395$ ; (Delaigue, Ourradi, Ossebar, et al., 2023), discrete samples from the UWS ( $n=32$ ; Delaigue, Ourradi, et al., 2023a) and another high-resolution UWS timeseries of ocean surface pH from the optode system (over 78,000 datapoints; Delaigue, Ourradi, et al., 2023b). “

**Line 141: Here is your first mention of pH on the total scale – you need to define what this is.**

A sentence was added: “The total scale accounts for sulfate ion dissociation in seawater, providing a more accurate representation of carbonate system equilibria compared to other pH scales commonly used in marine chemistry. Unless explicitly stated otherwise, all references to pH in this manuscript refer to pH on the total scale.”

**Fig. 2: What is the scale on the top and right sides of Fig. 3b?**

This was a mistake and both scales were removed. Thank you for spotting it.

**Line 346: Missing end parentheses.**

Fixed

**Fig. 4: The mean pH lines seem unnecessary, and they make it harder to see the other expected pH lines in the figures.**

These lines were removed from Figs 4 and 5.

**Fig. 4-5: You need to define what observed pH is (you do this in Fig. 6 but it needs to be when first used). Is this the underway pH corrected using the discrete TA and DIC data?**

Yes it is –  $\text{pH}_{\text{obs}}$  is now properly defined in the Methods section, and  $\text{pH}_{\text{TA,DIC}}$  has been removed altogether from the manuscript to avoid confusion. Both captions for Figs 4 and 5 were modified and now each term is properly defined:

(eg. Fig 4): “Figure 4. Identified diurnal cycles for cruise SO279 in the North Atlantic Ocean. Dark purple lines show observed pH ( $\text{pH}_{\text{obs}}$ ), dashed grey lines show mean observed pH over the full diurnal cycle, and black lines show overall mean pH for all diurnal cycles combined for that cruise. The remaining shows expected pH using varying temperature and salinity ( $\text{pH}_{\text{temp,sal}}$ ; dashed light purple lines), varying temperature alone ( $\text{pH}_{\text{temp}}$ ; dashed blue lines), varying salinity alone ( $\text{pH}_{\text{sal}}$ ; dashed orange lines) and constant TA and  $f\text{CO}_2$  ( $\text{pH}_{\text{TA,fCO}_2}$ ; dashed green lines). Grey areas are night hours.”

**Fig. 6: You need to define what  $\Delta\text{pH}$  is.**

Figure caption now reads as: “Fig.X Residual plots for diurnal cycles in the South Pacific, illustrating the discrepancies ( $\Delta\text{pH}$ ) [...]”

**Line 378: Again, is  $\text{pH}_{\text{obs}}$  the corrected underway pH measurements? Try to make this clearer.**

Sentence now reads “If  $\text{pH}_{\text{obs}}$  (i.e. corrected underway pH measurements using discrete TA and DIC subsamples) aligns with  $\text{pH}_{\text{temp,sal}}$ , it suggests that recent temperature changes, such as day-night cycles, primarily control pH.”

**Line 467: Are you referring to Fig. 8?**

Figure 8 as well as Fig. 4 in the Supplementary Information. Thank you for the correction.
